# Supplementary material for: COVID-19 infection alters kynurenine and fatty acid metabolism, correlating with IL-6 levels and renal status
Source: JCI journal article supplement (doi:10.1172/jci.insight.140327), 2020-06-19
Supplement: sd1 [file 1]

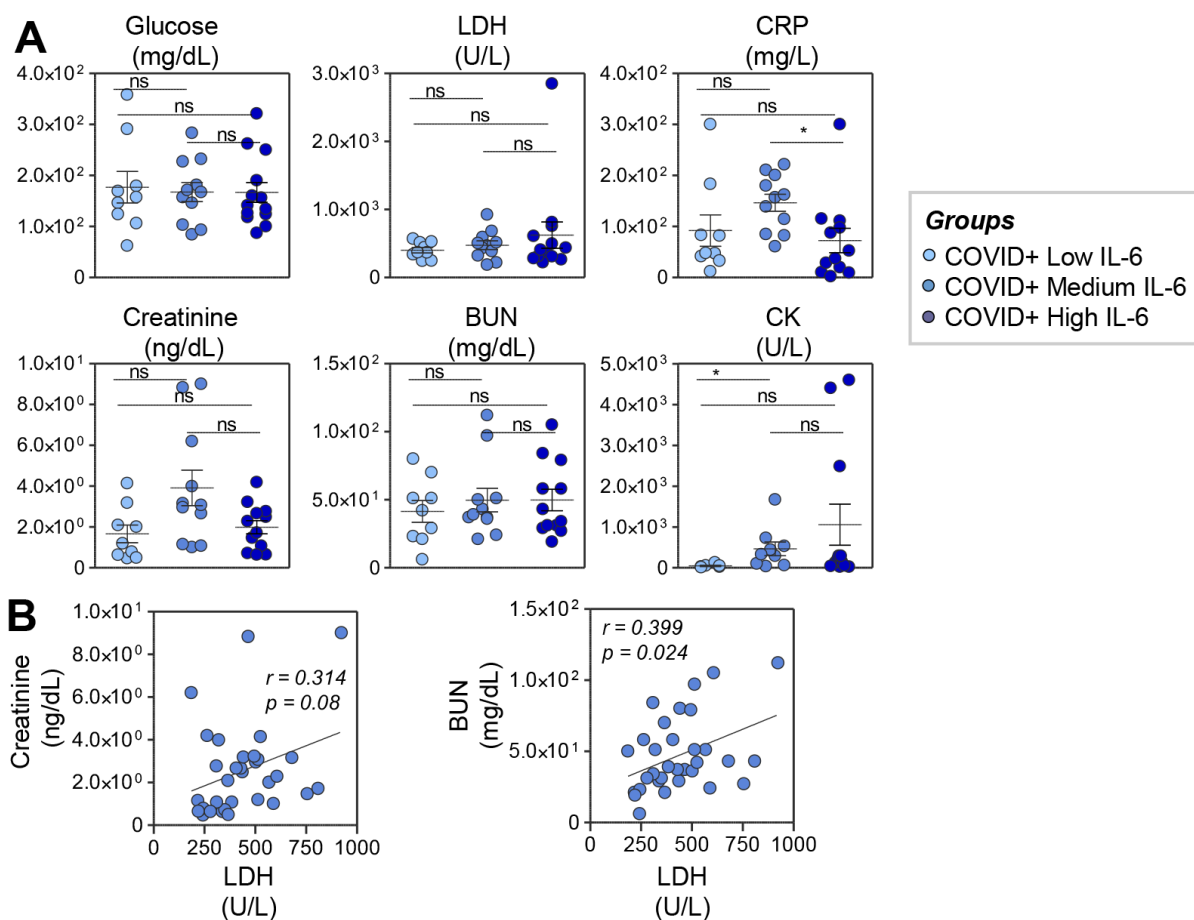

**Supplementary Figure 1 - Clinical variables in COVID-19 patients in the present study (n=33).** In **A**, dot plots represent clinical variables available from the same samples on which metabolomics analyses were performed. Asterisks indicate significance by ANOVA (One-way ANOVA with Tukey multiple column comparisons - \*  $p < 0.05$  ns = not significant). In **B**, poor correlations were noted between markers of hemolysis/cell lysis (LDH) and kidney function (Creatinine and BUN)

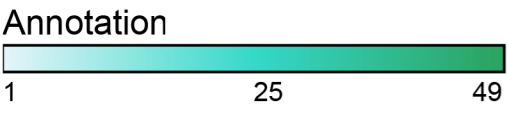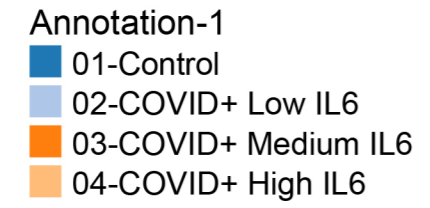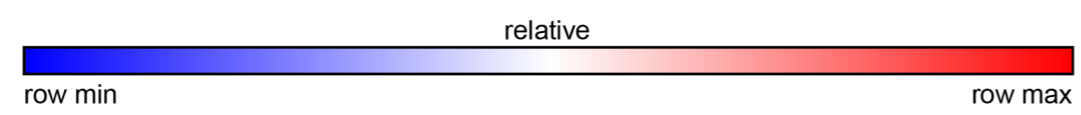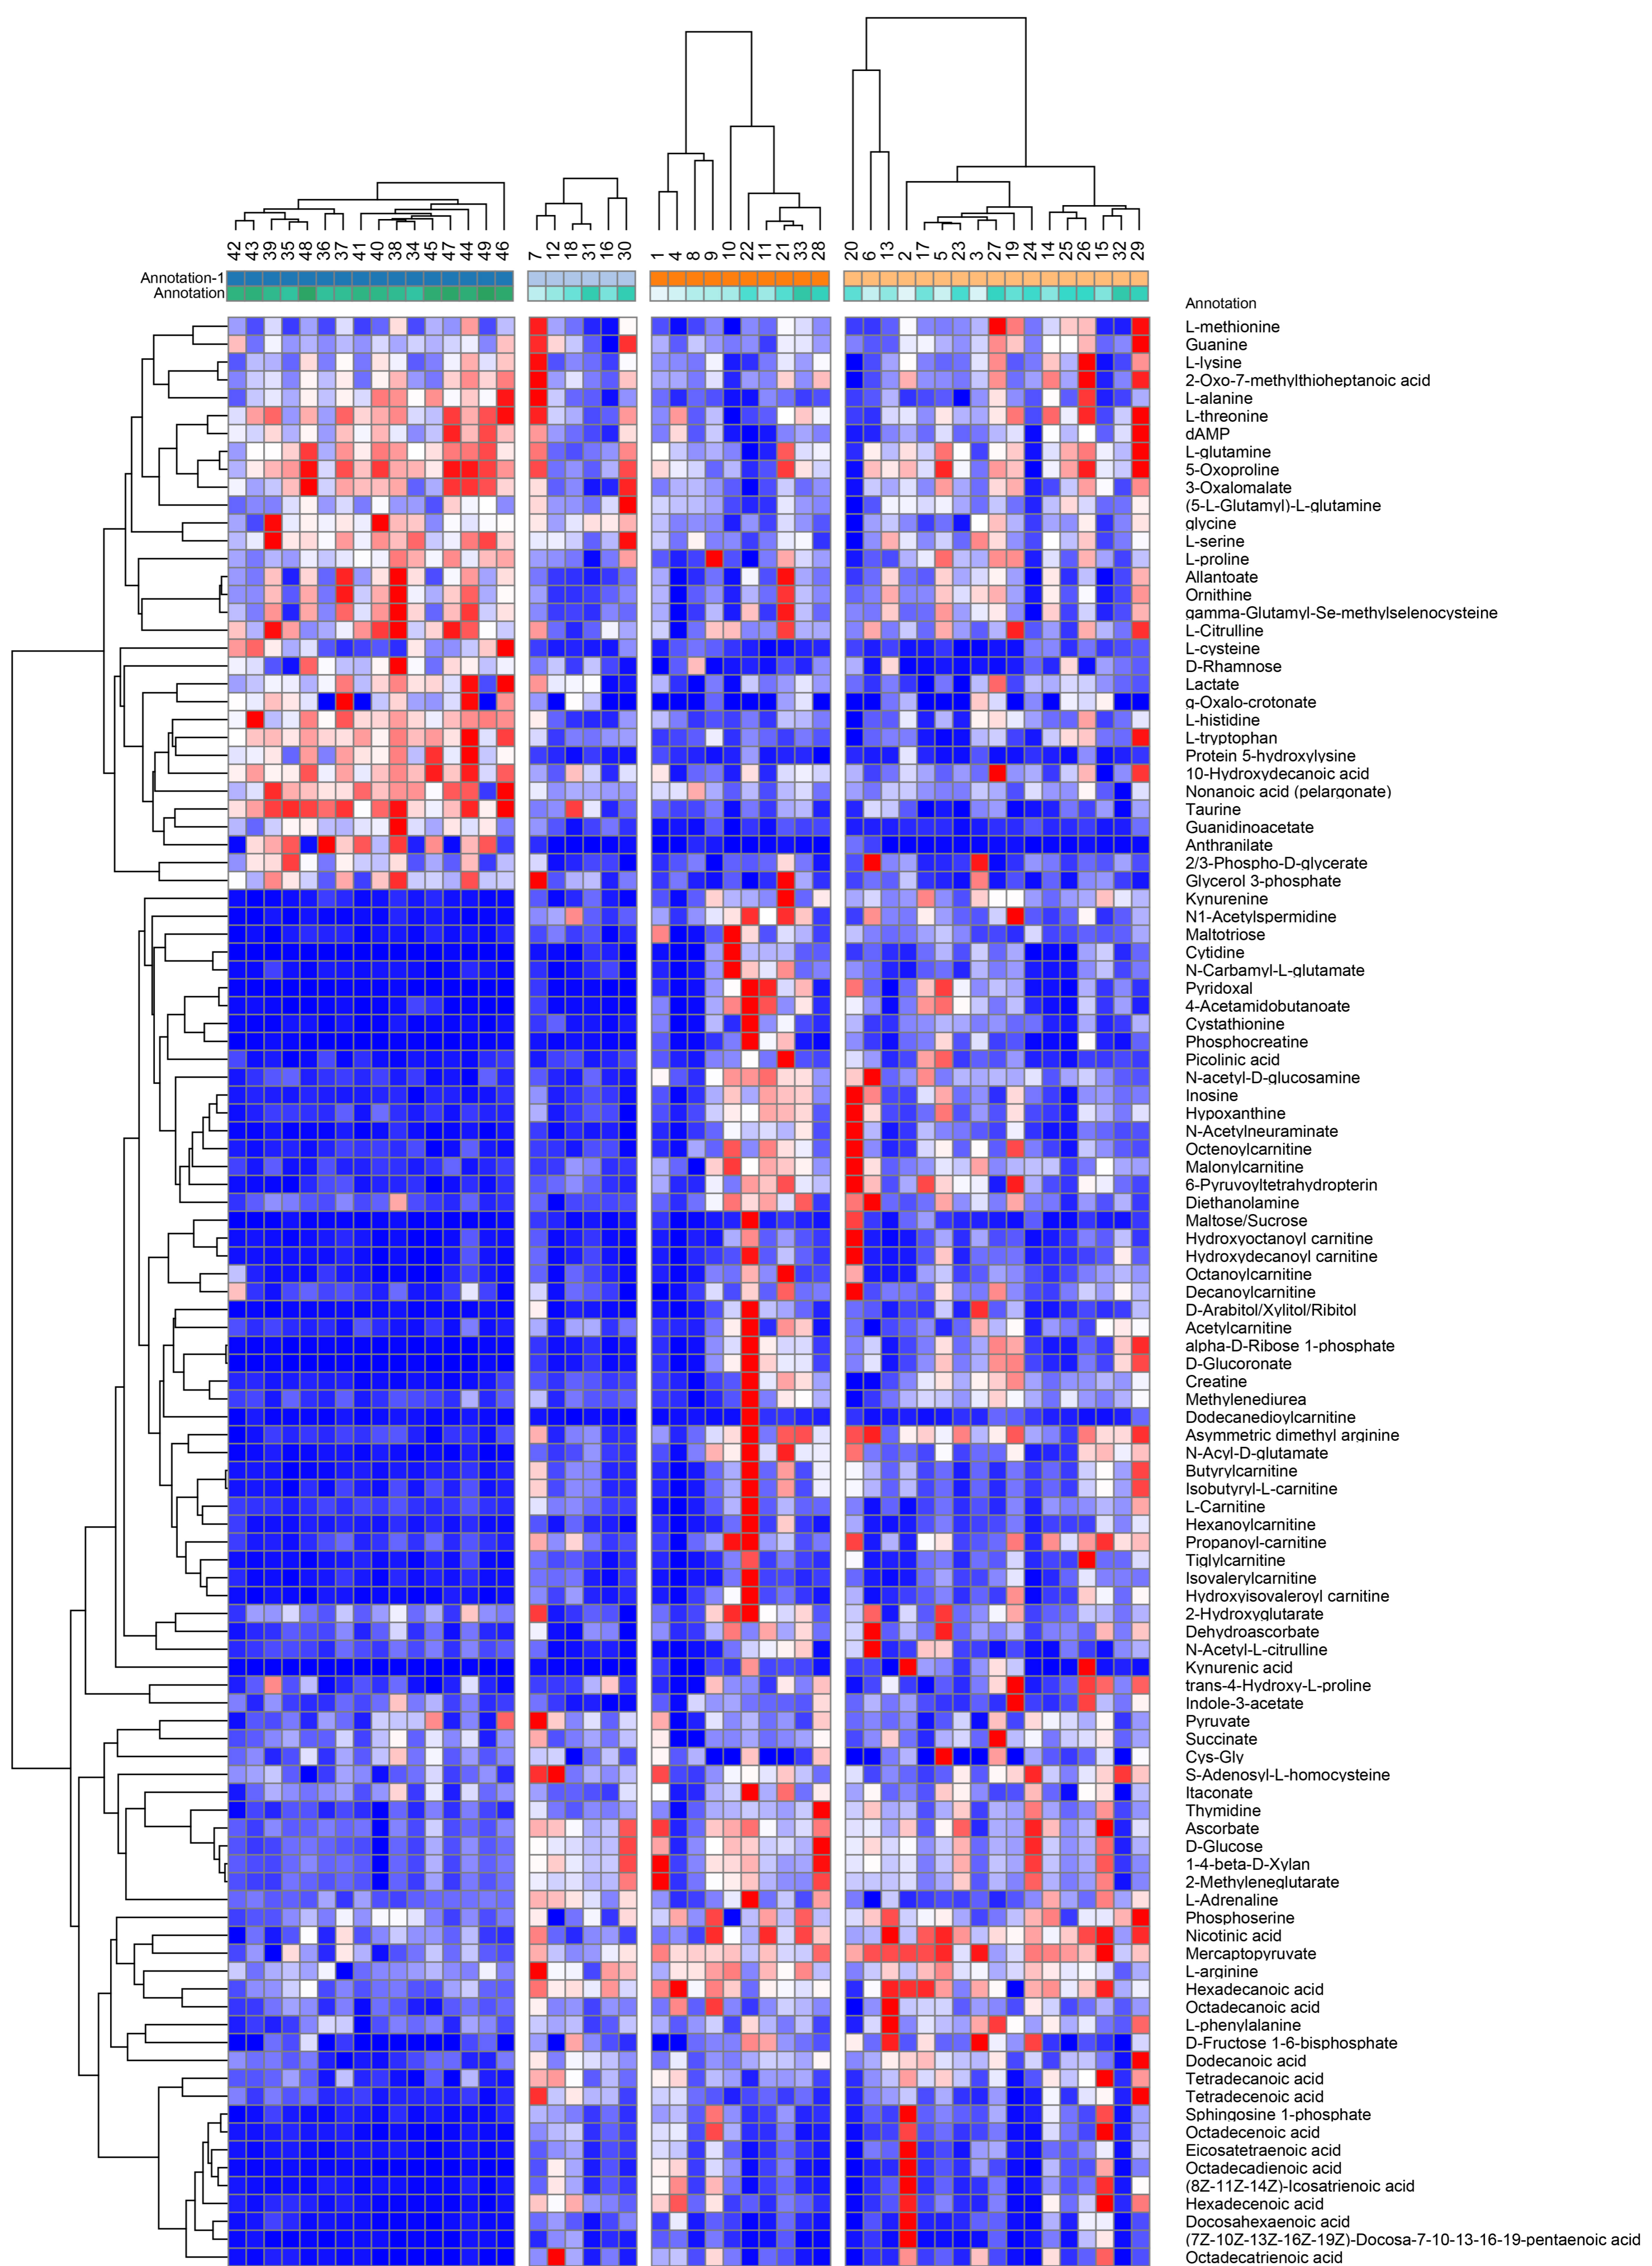

**Supplementary Figure 2 - Hierarchical clustering analysis.** A vectorial version of these results shows significant associations of COVID-19 and IL-6 levels with amino acid metabolism, purines, acylcarnitines, and fatty acids.

# Pathway Enrichment between Control and COVID + High IL-6

- Trp metabolism
- Asp and Asn metabolism
- Tyr metabolism
- Butanoate metabolism
- BCAA metabolism

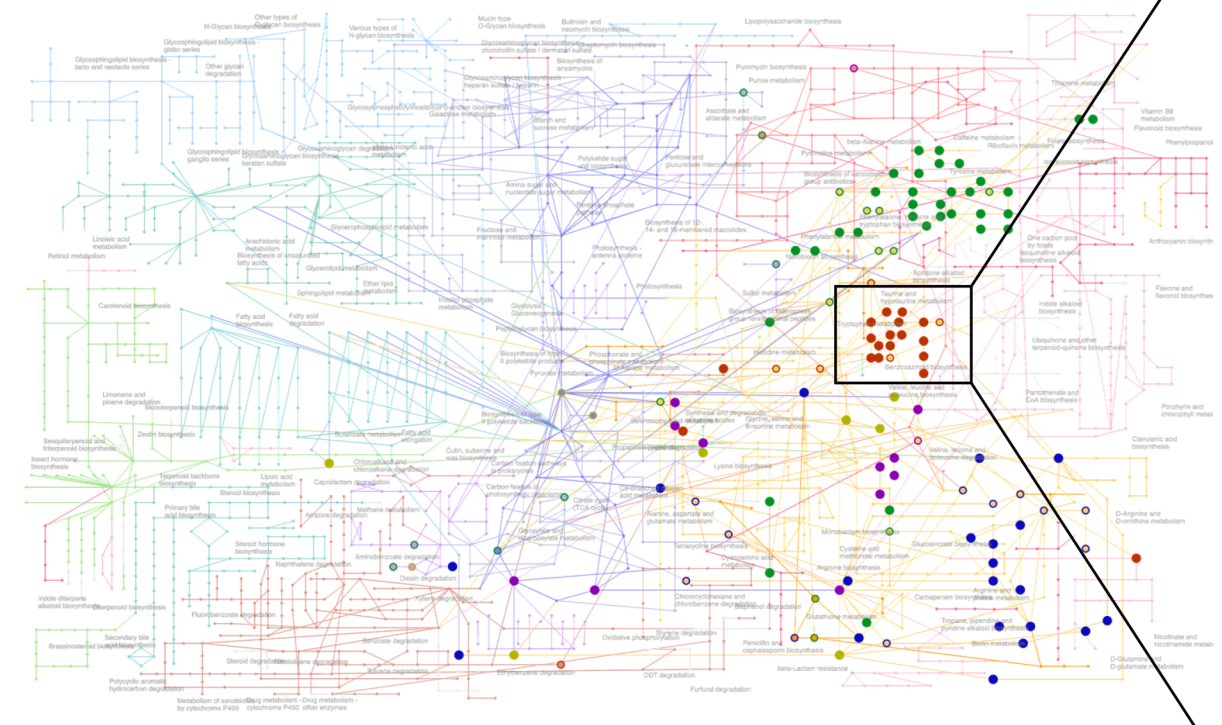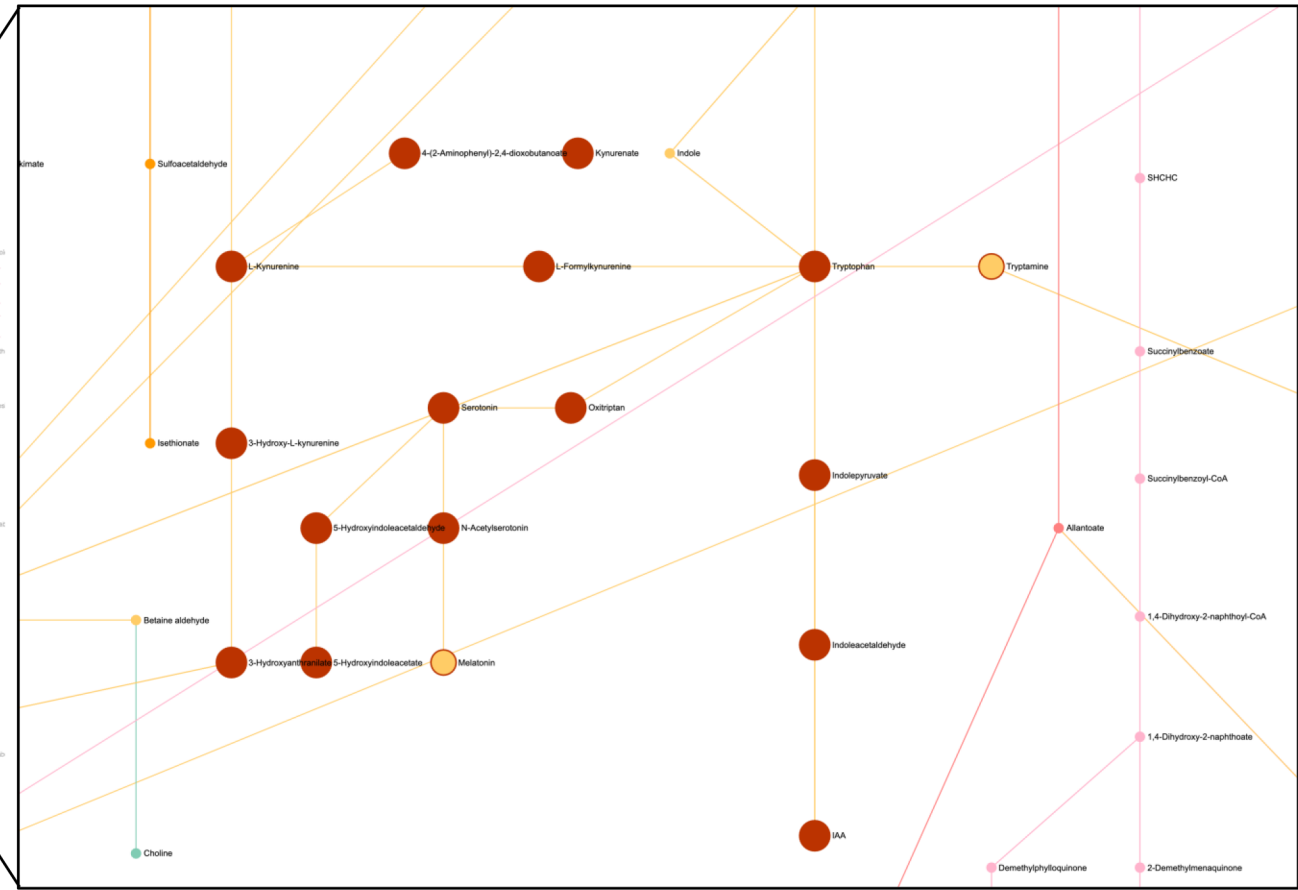

**Supplementary Figure 3 - Zoomed in version of Figure 2.E**  
 (i.e., top hits from these pathways are mapped against KEGG pathway map has01100.)
